# Supplementary material for: Genome-wide analysis of gene expression reveals gene regulatory networks that regulate chasmogamous and cleistogamous flowering in Pseudostellaria heterophylla (Caryophyllaceae)
Source: PubMed Central journal article supplement (PMC4875749; doi:10.1186/s12864-016-2732-0), 2016-05-20
Supplement: 12864_2016_2732_MOESM1_ESM.pdf [file 12864_2016_2732_MOESM1_ESM.pdf]

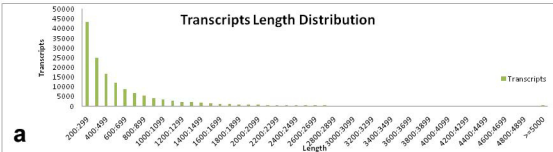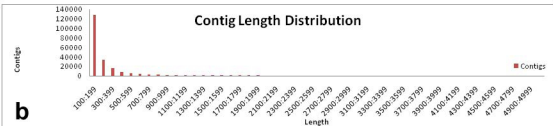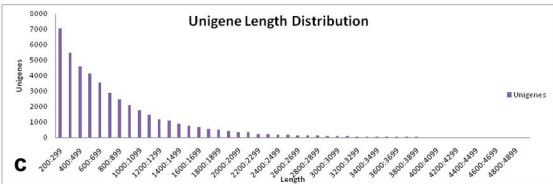

**Additional file 1 Distribution of contig lengths (a), transcripts lengths (b) and unigene lengths (c).**
